# Supplementary material for: Variation Ontology for annotation of variation effects and mechanisms
Source: HighWire-hosted journal article supplement (doi:10.1101/gr.157495.113), 2013-10-25
Supplement: Supplemental_Legends.docx [file Supplemental_Legends.docx]

**LEGENDS FOR SUPPLEMENTARY FIGURES**

Supplementary Figure 1. Example of VariO annotation of a splice site effect. XLA-causing G>A substitution in exon-intron boundary (BTKbase entry A0823). Insertion of 106 nucleotides from intron leads to frameshift alteration and premature stop. Expressed protein was not detectable in Western blot (Noordzij et al. 2002).

Supplementary Figure 2. Annotation of a start codon substitution. Example from BTKbase of a recurrent alteration at different codon positions (Bradley et al. 1994; Bykowsky et al. 1996; Yip et al. 2000; Noordzij et al. 2002, Conley et al. 2005, and direct submissions). As the variant prevents translation no protein is produced.

Supplementary Figure 3. Variation c.1077-1G>T affecting splicing in human *MSH2* gene entry NC_000002 is disease causing (Arnold et al. 2009). The variant destroys a canonical splice site and a cryptic splice site is activated 11 bp downstream in exon 12. As the size of the deletion is not divisible by three, it causes a frameshift change in RNA and distorts the protein sequence.

Supplementary Figure 4. Substitution E607Q in *Trypanosoma brucei* oligopeptidase B (Mohd Ismail et al. 2010). The variant has reduced catalytic activity and alterations in substrate specificity, but normal thermal stability.
